# Supplementary material
Source: PubMed Central journal article supplement (PMC4548811)
Supplement: NIHMS706049-supplement-1.pdf [file NIHMS706049-supplement-1.pdf]

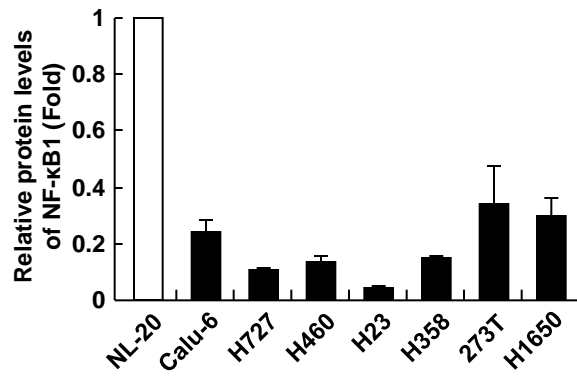

**Figure S1**

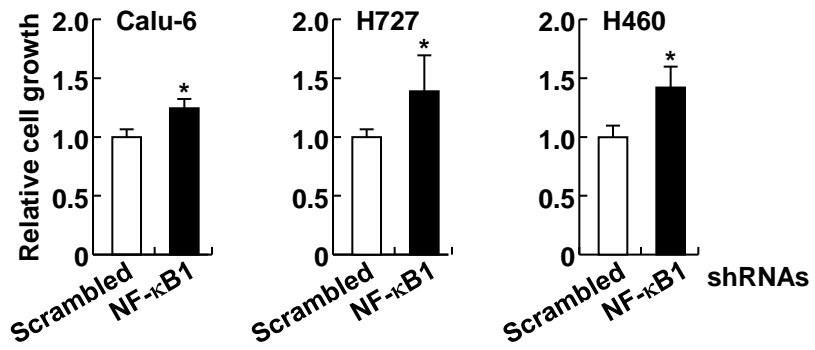

**Figure S2**

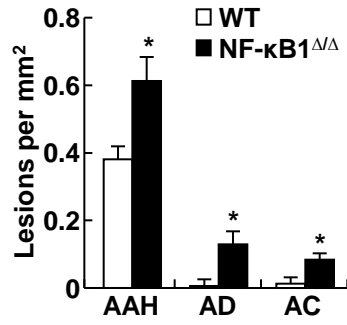

**Figure S3**

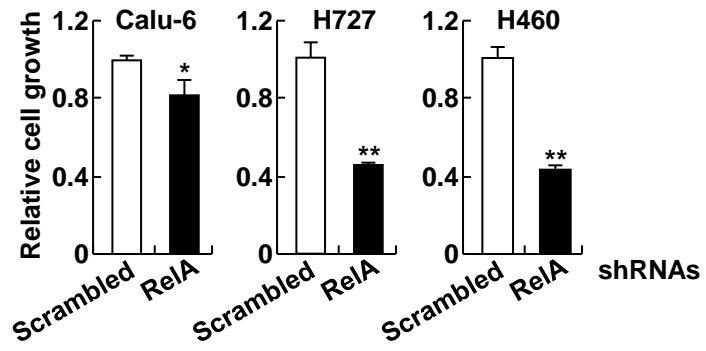

**Figure S4**

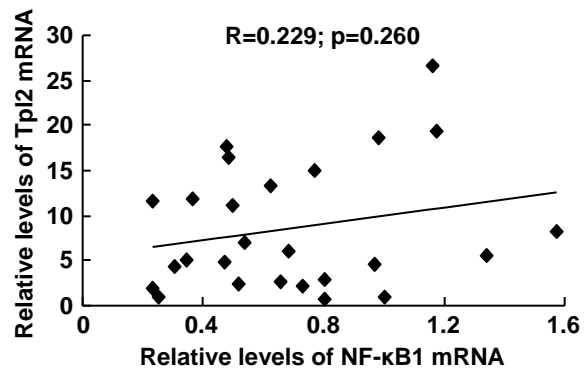

**Figure S5**

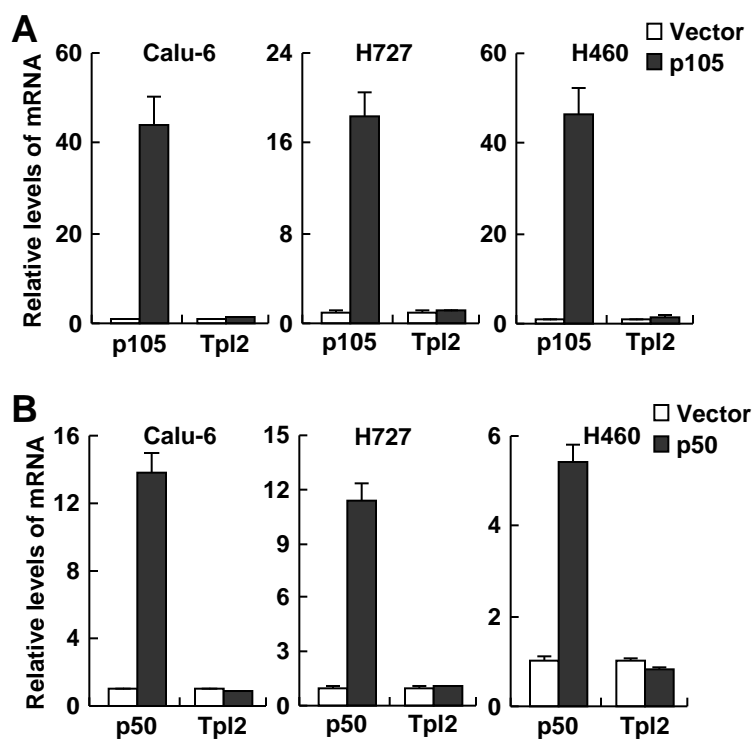

**Figure S6**

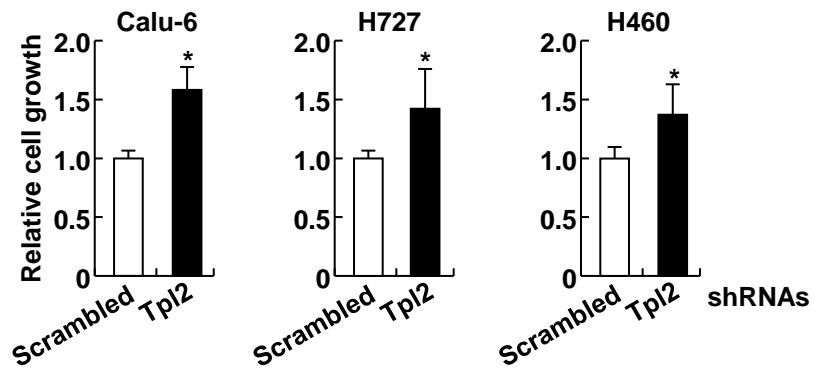

**Figure S7**

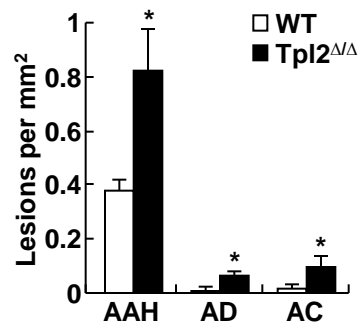

**Figure S8**



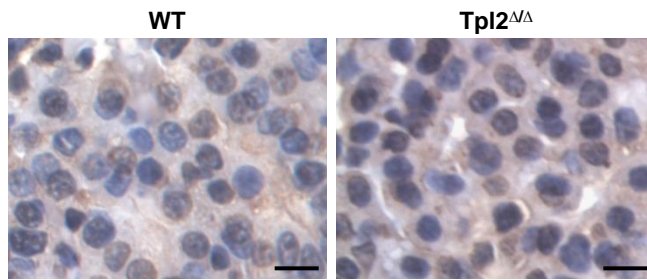

**Figure S9**

**Table S1. Clinicopathological characteristics of patients**

|                        | Patients (n) |
|------------------------|--------------|
| Risk                   |              |
| High                   | 15           |
| Low                    | 49           |
| Progression            |              |
| No                     | 30           |
| Yes                    | 32           |
| Sex                    |              |
| Female                 | 30           |
| Male                   | 34           |
| Smoking                |              |
| Non-active             | 36           |
| Active                 | 25           |
| Stage                  |              |
| I A                    | 11           |
| I B                    | 19           |
| II A/B                 | 12           |
| III                    | 15           |
| IV                     | 5            |
| Histology <sup>a</sup> |              |
| 1                      | 27           |
| 2                      | 30           |
| 3                      | 6            |
| 4                      | 1            |

<sup>a</sup>: 1, Adenosquamous carcinoma, Adenocarcinoma, BAC, Malignant carcinoid; 2, Squamous cell carcinoma; 3, Undifferentiated NSCLC, Large cell carcinoma, NSCLC; 4, Small cell carcinoma.

**Table S2. Primer pairs used for real-time PCR in the study**

| <b>Gene</b>           | <b>Accession number</b> | <b>Primer pairs</b>         |                               |
|-----------------------|-------------------------|-----------------------------|-------------------------------|
|                       |                         | <b>Forward (5' to 3')</b>   | <b>Reverse (5' to 3')</b>     |
| Mouse TNF $\alpha$    | NM_013693.3             | GATGAGAAGTTCCCAAATGGC       | ACTTGGTGGTTTGCTACGACG         |
| Mouse IL-6            | NM_031168.1             | AAAGAAATGATGGATGCTACCAAACCT | GGTACTCCAGAAGACCAGAGGAAATT    |
| Mouse IL-1 $\beta$    | NM_008361.3             | CCTCGTGCTGTCTGGACCCAT       | GGACAGGTATAGATTCTTTCCTTTGAGGC |
| Mouse CCL2            | NM_011333.3             | GCTGTTACACAGTTGCCGGCTG      | GGGCGTAACTGCATCTGGCT          |
| Mouse CCL3            | NM_011337.2             | GCTCCCAGCCAGGTGTCATTTTC     | GGGTTCTCGCTGCCTCCAA           |
| Mouse CCL4            | NM_013652.2             | CAGCACCAATGGGCTCTGACC       | ACCACAGCTGGCTTGGAGCAAA        |
| Mouse CXCL2           | NM_009140.2             | ACCAACCACCAGGCTACAG         | GCGTCACACTCAAGCTCT            |
| Mouse Tpl2            | NM_007746.2             | GAGTCTGGACTCTGCCCTCTTTGAAC  | GACTCTTCGGTGCTGCCTGTGC        |
| Human NF- $\kappa$ B1 | NM_003998               | GCAGATGGCCATACCTTCA         | TAGAGGCACCAGGTAGTCCA          |
| Human Tpl2            | NM_001244134            | AAGGACCTCCGAGGAACAGA        | CTGCTTTGGTTGAATGGCCC          |
| 18sRNA                | NR_003278.3             | AGGAATTGACGGAAGGGCAC        | GGACATCTAAGGGCATCACA          |
